# Supplementary material for: EsxA membrane-permeabilizing activity plays a key role in mycobacterial cytosolic translocation and virulence: effects of single-residue mutations at glutamine 5
Source: PubMed Central journal article supplement (PMC5013644; doi:10.1038/srep32618), 2016-09-07
Supplement: srep32618-s1.pdf [file srep32618-s1.pdf]

**EsxA membrane-permeabilizing activity plays a key role in mycobacterial cytosolic translocation and virulence: effects of single mutation at glutamine 5**

Qi Zhang<sup>1,3</sup>, Decheng Wang<sup>2,5</sup>, Guozhong Jiang<sup>1,4</sup>, Wei Liu<sup>1,4</sup>, Qing Deng<sup>2</sup>, Xiujun Li<sup>6</sup>, Wei Qian<sup>7</sup>, Hugues Ouellet<sup>1</sup>, Jianjun Sun<sup>1,7</sup>

**Table S1.** The p-values calculated by Log-Rank analysis of zebra fish embryos survival (\* p < 0.05).

|                            | Mm | Mm<br>$\Delta$ EsxA/B | Mm<br>$\Delta$ EsxA/B(WT) | Mm<br>$\Delta$ EsxA/B(Q5K) | Mm<br>$\Delta$ EsxA/B(Q5V) |
|----------------------------|----|-----------------------|---------------------------|----------------------------|----------------------------|
| Mm                         | -  | 0.00018*              | 0.178                     | 0.00114*                   | 0.489                      |
| Mm<br>$\Delta$ EsxA/B      |    | -                     | 0.013*                    | 0.585                      | 1.7e-05*                   |
| Mm<br>$\Delta$ EsxA/B(WT)  |    |                       | -                         | 0.0496*                    | 0.0463*                    |
| Mm<br>$\Delta$ EsxA/B(Q5K) |    |                       |                           | -                          | 0.000127*                  |
| Mm<br>$\Delta$ EsxA/B(Q5V) |    |                       |                           |                            | -                          |

**Table S2:** Sequences of the primers for *esxA/esxB* knockout in *Mm* and for PCR confirmation

| Primers                      | Forward                                    |
|------------------------------|--------------------------------------------|
| KO-Left Arm-F ( $P_{LA1}$ )  | 5'-GAATTCCTGCAGGATGCCTTCAACGAGATGGATTAC-3' |
| KO-Left Arm-R ( $P_{LA2}$ )  | 5'-CTCTAGAGGATCCCCCGGCATCGGTCTTCATCTCT-3'  |
| KO-Right Arm-F ( $P_{RA1}$ ) | 5'-CTCTAGAGGATCCCCGAACCTGGCTCGCACCATC-3'   |
| KO-Right Arm-R ( $P_{RA2}$ ) | 5'-GACTAGAGGGTACCCTTCTTCTGCTATGTCCTGTTG-3' |
| PCR-Left Arm-F-1             | 5'-TAGAAGTCAGCGACGGCGCAGCCAG-3'            |
| PCR-Left Arm-R-1             | 5'-CGTGGTCGAGGCGATGGCGGAG-3'               |
| PCR-Left Arm-F-2             | 5'-TCGAACTGTACCGGATTTTCG-3'                |

|                      |                            |
|----------------------|----------------------------|
| PCR-Right Arm-R-2    | 5'-GCTGATGGGCTTCGGTTG-3'   |
| PCR-P <sub>CE1</sub> | 5'-CAGCATGGCAGAGATGAAGA-3' |
| PCR-P <sub>CE2</sub> | 5'-CGGTATTCTACGCGAACGAG-3' |

Supplemental Figure 1

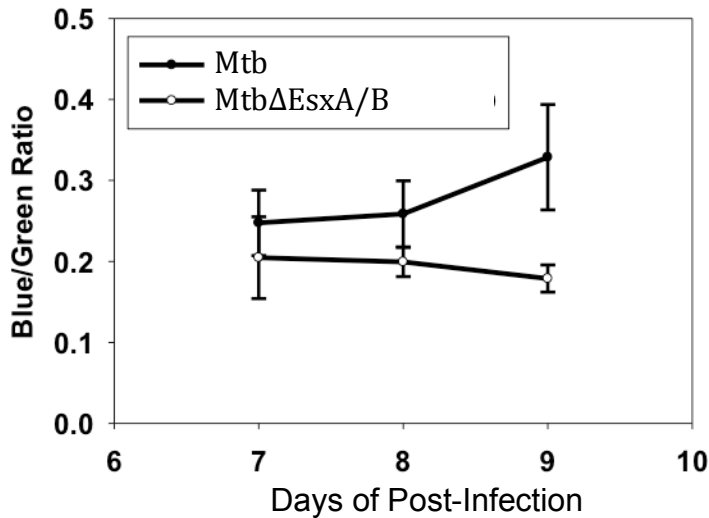

**Figure S1. Time course of cytosolic translocation of Mtb and MtbΔEsxA/B in THP-1 cells measured by a fluorometer.** THP-1 cells were infected with Mtb or MtbΔEsxA/B at MOI of 2. At the 7, 8 and 9 days of post-infection, the cells were loaded with CCF4-AM for 2 h. The cells were washed, detached and fixed by PFA. Blue (450nm)/green (530) ratio was measured in the fluorometer with excitation at 409 nm. The data is presented as means ± S.E.
